# Supplementary material for: Decreased incidence, virus transmission capacity, and severity of COVID-19 at altitude on the American continent
Source: PubMed Central journal article supplement (PMC8006995; doi:10.1371/journal.pone.0237294), 2021-03-29
Supplement: pone.0237294.s001.pdf [file pone.0237294.s001.pdf]

**S1 Table. Capitals of American countries located above 1,000 m above sea level.**

| <b>City</b>    | <b>Country</b> | <b>Population</b> | <b>Population density<br/>(inhabitants/Km<sup>2</sup>)</b> | <b>Average altitude<br/>(masl)</b> |
|----------------|----------------|-------------------|------------------------------------------------------------|------------------------------------|
| La Paz         | Bolivia        | 1,864,191         | 378                                                        | 3,600                              |
| Quito          | Ecuador        | 1,100,000         | 475.51                                                     | 2,850                              |
| Bogota         | Colombia       | 6,422,198         | 24,643                                                     | 2,625                              |
| Mexico City    | Mexico         | 22,000,000        | 5,966                                                      | 2,240                              |
| Guatemala City | Guatemala      | 1,700,000         | 159                                                        | 1,529                              |
| San Jose       | Costa Rica     | 2,723,000         | 7,548                                                      | 1,146                              |
| Brasilia       | Brazil         | 1,650,000         | 423.28                                                     | 1,079                              |
