# Supplementary material for: Decreased incidence, virus transmission capacity, and severity of COVID-19 at altitude on the American continent
Source: PubMed Central journal article supplement (PMC8006995; doi:10.1371/journal.pone.0237294), 2021-03-29
Supplement: pone.0237294.s003.pdf [file pone.0237294.s003.pdf]

## S1 Appendix. Equations and parameters used in the SEIR model.

Total population:  $N = S(t) + E(t) + I(t) + R(t)$

$$\frac{dS(t)}{dt} = -\beta S(t)I(t)$$

$$\frac{dE(t)}{dt} = \beta S(t)I(t) - \epsilon E(t)$$

$$\frac{dI(t)}{dt} = \epsilon E(t) - \gamma I(t)$$

$$\frac{dR(t)}{dt} = \gamma I(t)$$

$\beta$  = interaction frequency among individuals \* probability of transmission of the disease

$$\epsilon = \frac{1}{\text{incubation period}}$$

$$\gamma = \frac{1}{\text{infectious period}}$$

Where:

$S(t)$ : Fraction of population that is susceptible.

$E(t)$ : Fraction of population that is exposed to infection.

$I(t)$ : Fraction of the population that is infected.

$R(t)$ : Fraction of population that has recovered or died.

$\beta$ : Contact rate

$\epsilon$ : Rate at which exposed individuals become infected.

$\gamma$ : Recovery rate.

| Parameter                         | Value    | Source                                                                                                                |
|-----------------------------------|----------|-----------------------------------------------------------------------------------------------------------------------|
| Infectious period                 | 7.5 days | Comité Operativo de Emergencias UMSA. Situación y proyecciones de COVID-19 en Bolivia: 3er reporte. La Paz - Bolivia: |
| Incubation period                 | 6 days   | Universidad Mayor de San Andrés, May, 2020. Report No.: 3.                                                            |
| Interaction frequency             | 8.1      | Birbuet JC, López R. Dinámica de expansión del COVID-19 en Bolivia durante las primeras 6 semanas. 2020.              |
| Initial number of infected people | 30       |                                                                                                                       |
