# Supplementary material for: Decreased incidence, virus transmission capacity, and severity of COVID-19 at altitude on the American continent
Source: PubMed Central journal article supplement (PMC8006995; doi:10.1371/journal.pone.0237294), 2021-03-29
Supplement: pone.0237294.s004.pdf [file pone.0237294.s004.pdf]

# S1 Fig. Effect of altitude in the incidence of COVID-19 per countries

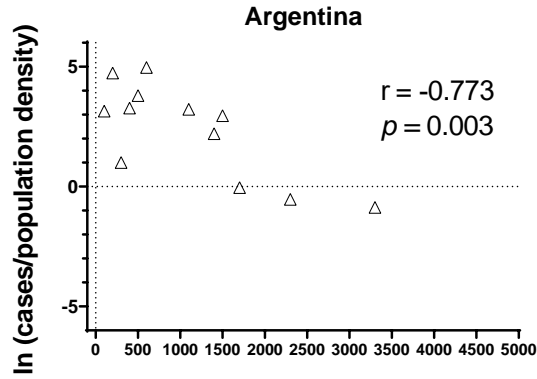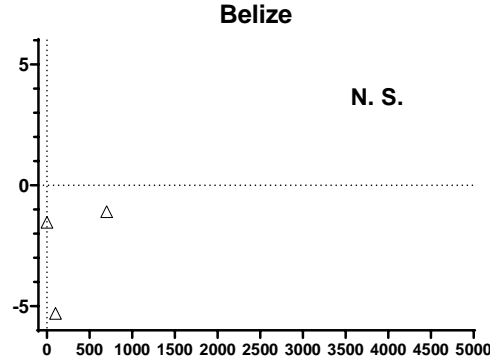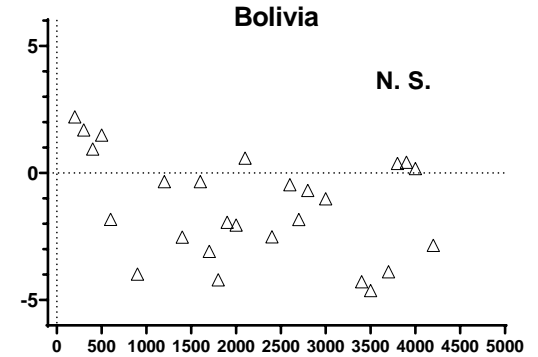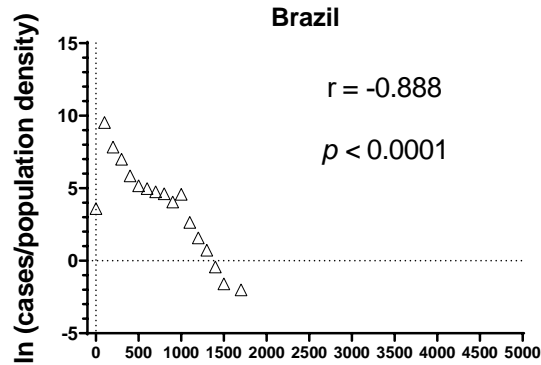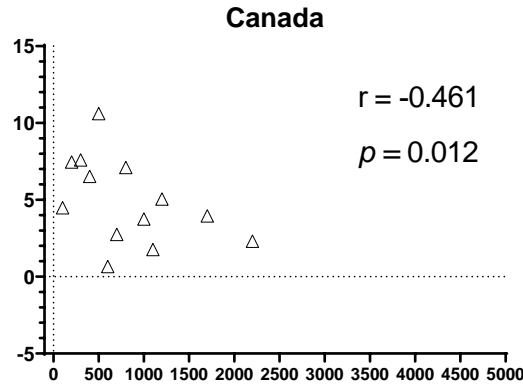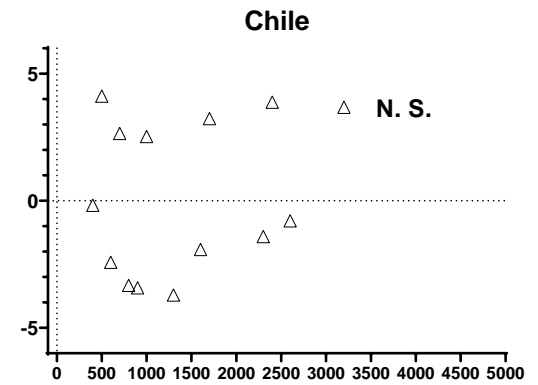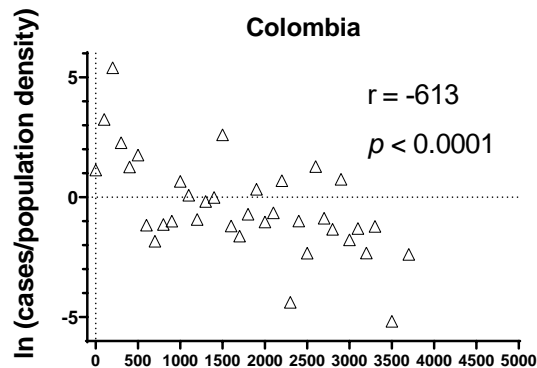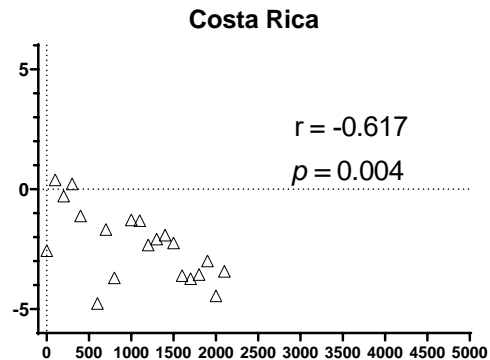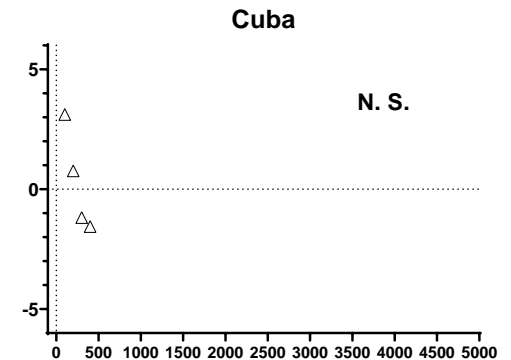

Altitude (masl)

Altitude (masl)

Altitude (masl)

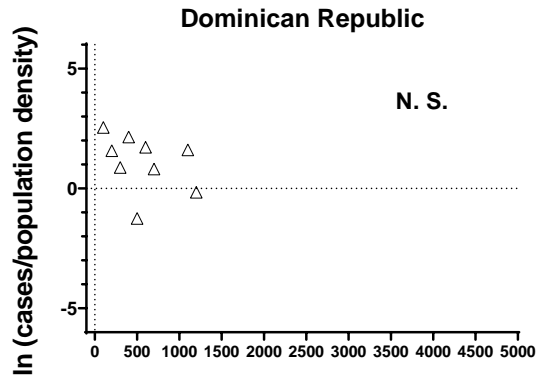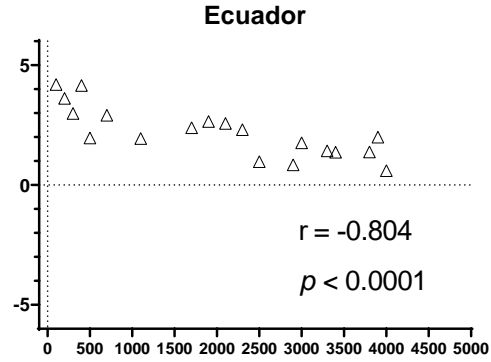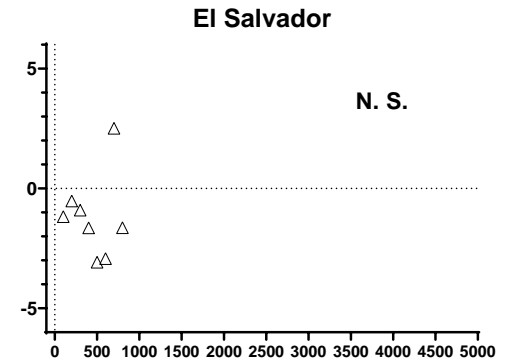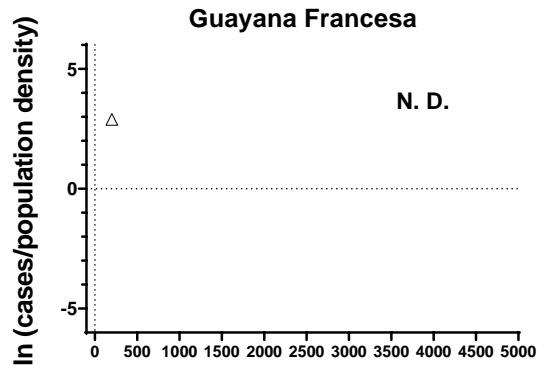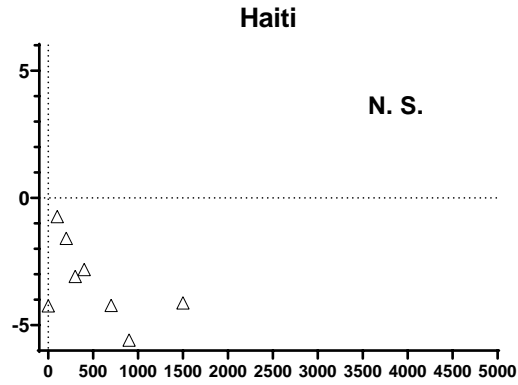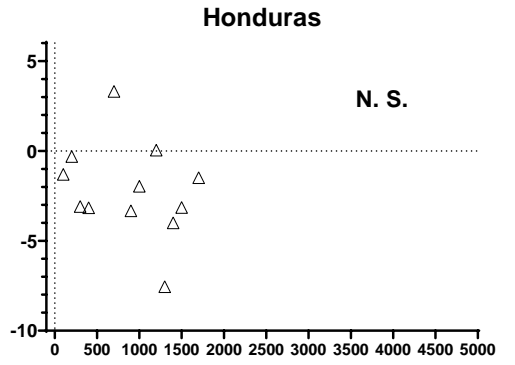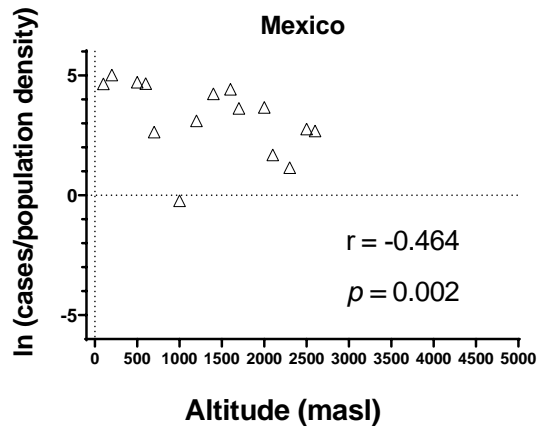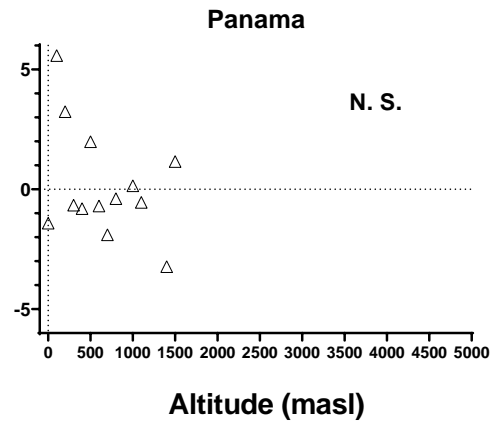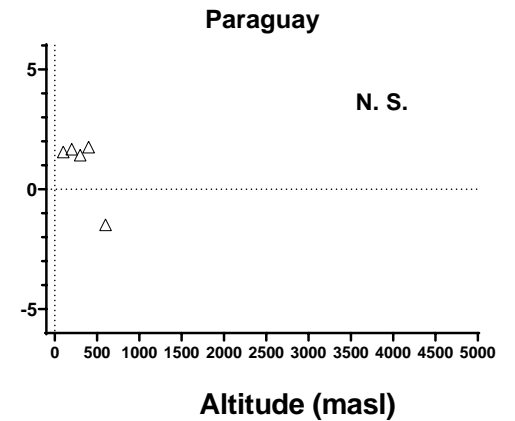

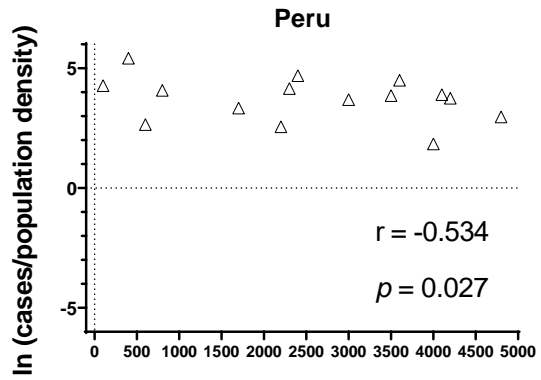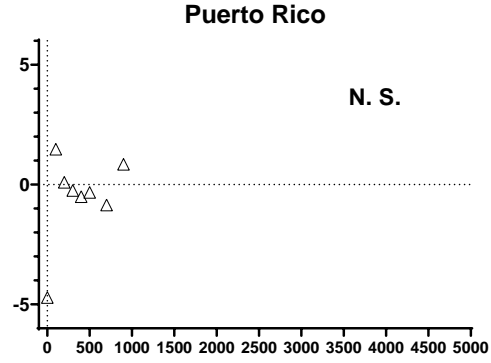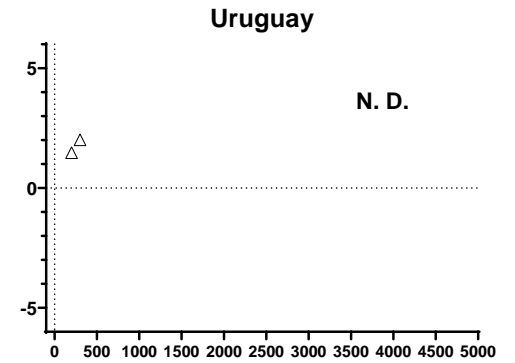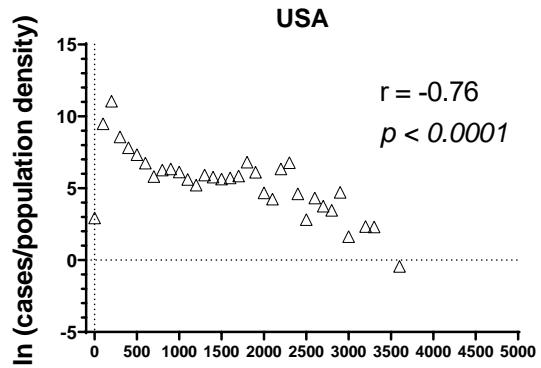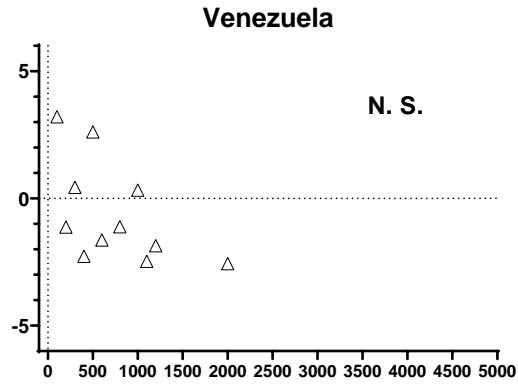

**Altitude (masl)**

**Altitude (masl)**

**Altitude (masl)**
